# Supplementary material for: 2020 Evaluation of Portable Vision Screening Instruments
Source: PubMed Central journal article supplement — Yale J Biol Med. 2021 Mar 31;94(1):107–14. (PMC7995935), 2021-03-31
Supplement: yjbm_94_1_107_appendix.pdf [file yjbm_94_1_107_appendix.pdf]

Appendix A. List of studies that test the sensitivities and specificities of pediatric vision screening instruments compared to the criterion standard confirmatory examination.

| Last name of first author | Location   | Year | Journal                         | Comparison                                 | Age of Children | Referral Criteria                |
|---------------------------|------------|------|---------------------------------|--------------------------------------------|-----------------|----------------------------------|
| Yakar                     | Brazil     | 2020 | Arq. Bras. Oftalmol.            | spot vs standard autorefractor             | 3-10 yrs        | AAPOS 2013                       |
| Forcina                   | US         | 2017 | AJO                             | spot                                       | 6-35mo          | AAPOS 2013                       |
| Petersheim                | US         | 2014 | JAAPOS                          | spot                                       | 11-221          | AAPOS 2013, v.1.1..., v.2.0.16   |
| Srinivasan                | US         | 2019 | JAAPOS                          | spot                                       | 6-36 mo         | AAPOS 2013 (also study specific) |
| Silbert                   | US         | 2014 | JAAPOS                          | spot                                       | 1-6y            | AAPOS 2013, version1.03          |
| Mendez                    | Costa Rica | 2015 | JAAPOS                          | spot                                       | 20-119          | AAPOS 2013                       |
| Nishimura                 | Canada     | 2019 | BMC                             | spot vs Plusoptix vs PVS                   | 3-6y            | AAPOS 2013                       |
| Arnold                    | US         | 2013 | JAAPOS                          | iScreen vs Plusoptix vs spot vs icheckkids | 6-130mo         | AAPOS 2003                       |
| Zhang                     | China      | 2019 | OPO                             | spot vs Plusoptix                          | <7              | AAPOS 2013                       |
| Arnold                    | US         | 2020 | Clic ophth                      | 2WIN vs blinq                              | median 6.5y     | 2003 AAPOS                       |
| Racano                    | US         | 2019 | JAAPOS                          | 2WIN vs Plusoptix                          | mean 37.9m      | 2013 AAPOS                       |
| Arnold                    | US         | 2019 | AJO                             | 2WIN                                       | median 6y       | 2003 AAPOS                       |
| Kirk                      | US         | 2014 | JPOS                            | 2WIN vs Plusoptix vs SPOT                  | 1-10y           | 2WIN                             |
| Kirk                      | US         | 2014 | JPOS                            | 2WIN vs Plusoptix vs SPOT                  | 1-10y           |                                  |
| Nishimura                 | Canada     | 2019 | BMC                             | Plusoptix vs spot                          |                 | AAPOS 2013                       |
| Kinori                    | US         | 2018 | Curr Eye Research               | Plusoptix vs retinomax                     | 3-5y            | ROC3                             |
| Crescioni                 | US         | 2015 | JAAPOS                          | Plusoptix vs spot                          | 3-6 grade       | AAPOS 2013                       |
| Ugurbas                   | Turkey     | 2019 | BMC                             | Plusoptix                                  | 36mo-11yrs      | ROC5                             |
| Zhang                     | China      | 2019 | OPO                             | Plusoptix vs spot                          | <7              | AAPOS 2013                       |
| Silbert                   | US         | 2013 | JAAPOS                          | iScreen vs MTI                             | 6mo-17y         | AAPOS 2003                       |
| Arnold                    | US         | 2013 | Binocular Vision and Strabology | iScreen vs Plusoptix vs spot               |                 | AAPOS 2003                       |
| Arnold                    | US         | 2013 | JAAPOS abstract                 | iScreen vs Plusoptix vs spot vs icheckkids | 6-130mo         | AAPOS 2003                       |
| Wang                      | US         | 2012 | JAAPOS abstract                 | iScreen vs Plusoptix                       | 5mo-13y         | AAPOS 2003                       |
| Kerr                      | US         | 2011 | AOJ                             | iScreen                                    | 2-5y            |                                  |
| Omran                     | US         | 2011 | Abstract                        | iScreen                                    |                 | AAPOS 2003                       |
| Haschke                   | US         | 2018 | JPOS                            | Optec                                      |                 | AAPOS 2013                       |
| Law                       | US         | 2020 | JAAPOS                          | gocheck                                    | 3-48mo          | 2013 AAPOS, 2017 AAO             |
| Walker                    | US         | 2020 | JAAPOS                          | gocheck                                    | 6mo-6y          | 2013 AAPOS                       |
| Petersiem                 | US         | 2018 | AJO                             | gocheck                                    | 6mo-6y          | 2013 AAPOS                       |
| Arnold                    | US         | 2020 | JPOS                            | gocheck                                    |                 | 2013 AAPOS                       |
| Arnold                    | US         | 2018 | Clinical Ophthalmology          | gocheck                                    | 1-6y            | 2013 AAPOS                       |
| Arnold                    | US         | 2014 | JPOS                            | gocheck vs spot vs Plusoptix vs iScreen    | 1-12y           | 2003 AAPOS                       |
| Arnold                    | US         | 2020 | Clic ophth                      | 2WIN vs blinq                              | median 6.5      | 2003 AAPOS                       |
| Nishimura                 | Canada     | 2019 | BMC                             | PVS vs Plusoptix vs PVS                    | 3-6y            | manufacturer                     |
| Yanni                     | US         | 2013 | ARVO Abstract                   | PVS vs SureSight vs Randot                 | 2-6y            | manufacturer                     |
| Jost                      | US         | 2014 | JAMA Ophtho                     | PVS vs SureSight                           | 2-6y            | manufacturer                     |
| Beauchamp                 | US         | 2013 | JAAPOS Abstract                 | PVS vs SureSight                           | 2-6y            | manufacturer                     |
| Kane                      | US         | 2012 | JAAPOS                          | PVS                                        | 3-8y            | manufacturer                     |
| Loudon                    | US         | 2011 | IOVS                            | PVS                                        | 2-18y           | manufacturer                     |
